# Supplementary material for: Three-dimensional N-doped mesoporous carbon–MXene hybrid architecture for supercapacitor applications
Source: Royal Society of Chemistry journal article supplement (doi:10.1039/d2ra06817f), 2023-01-01
Supplement: d2ra06817f1.pdf [file d2ra06817f1.pdf]

# Three-dimensional N-doped mesoporous Carbon–MXene Hybrid Architecture for Supercapacitor Applications

Abeer Enaiet Allah

Chemistry Department, Faculty of Science, Beni-Suef University, Beni-Suef 62511, Egypt.

\*Correspondence: [abeer.abdelaal@science.bsu.edu.eg](mailto:abeer.abdelaal@science.bsu.edu.eg)

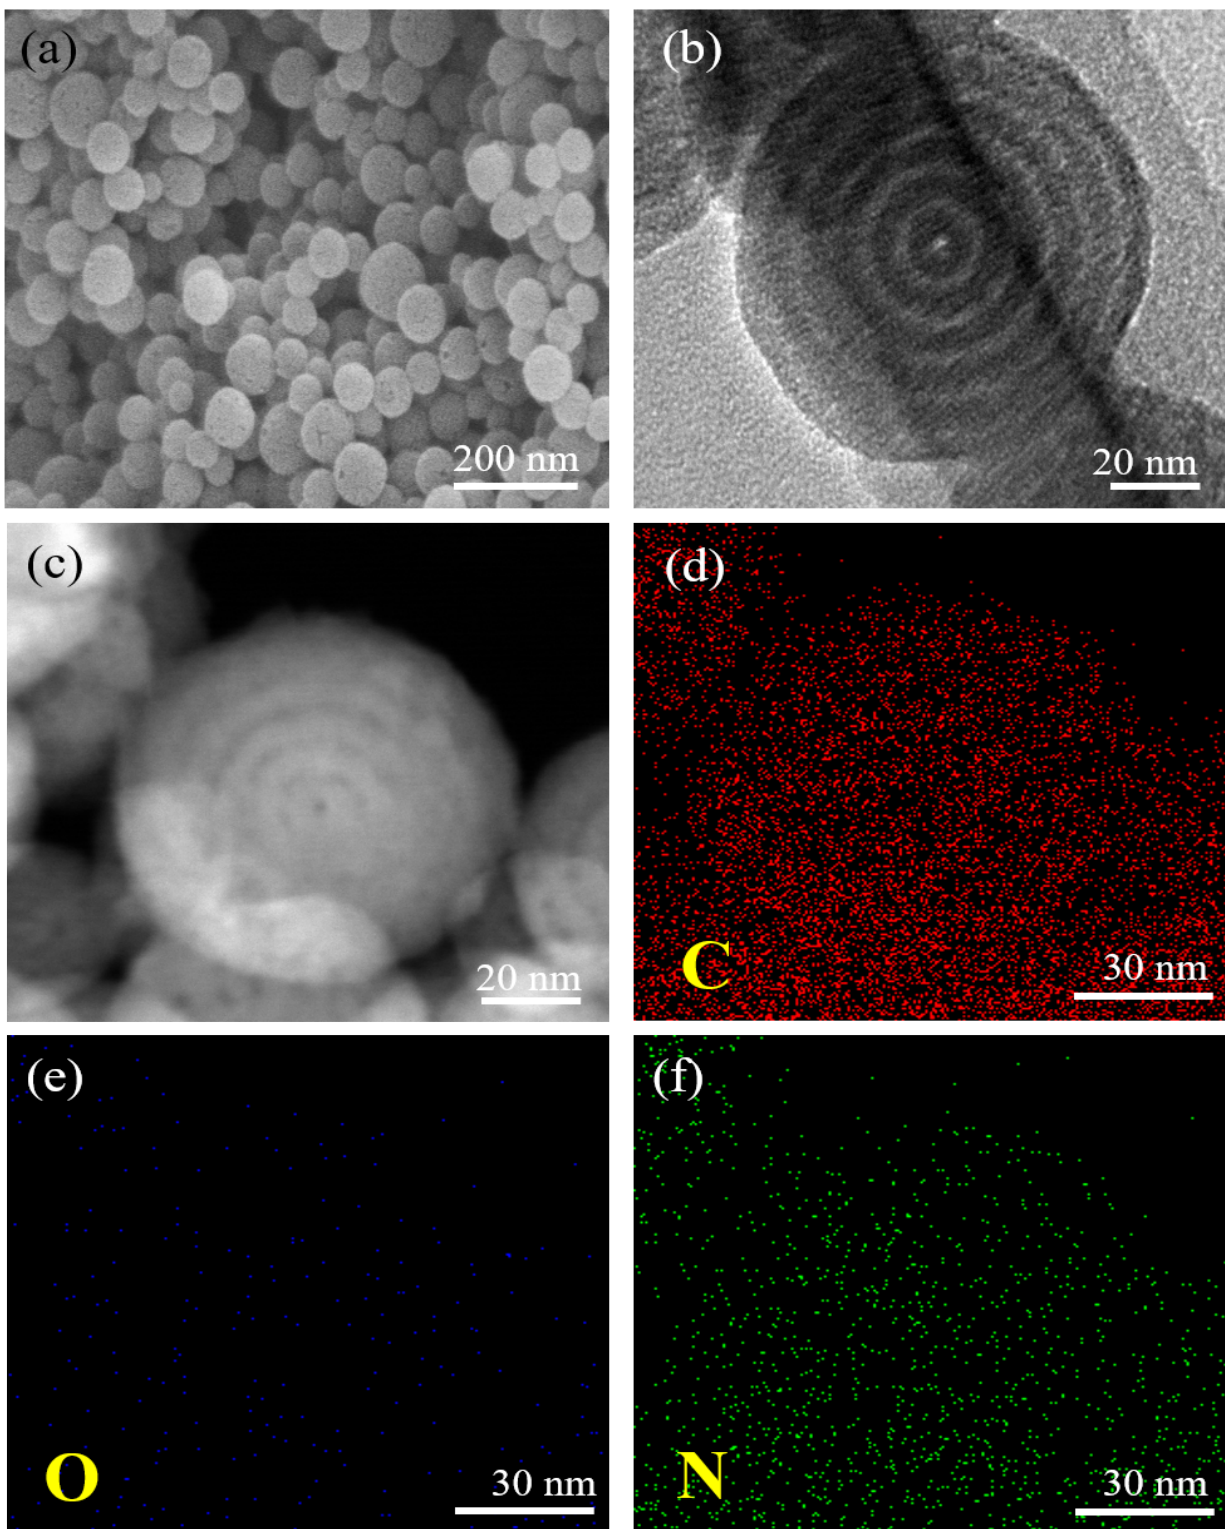

Figure S1: a) SEM of the as-prepared precursor of NMC (P123/PMF), b) TEM of NMC-900, and (c-f) HAADF-STEM image of NMC and its elemental mapping.

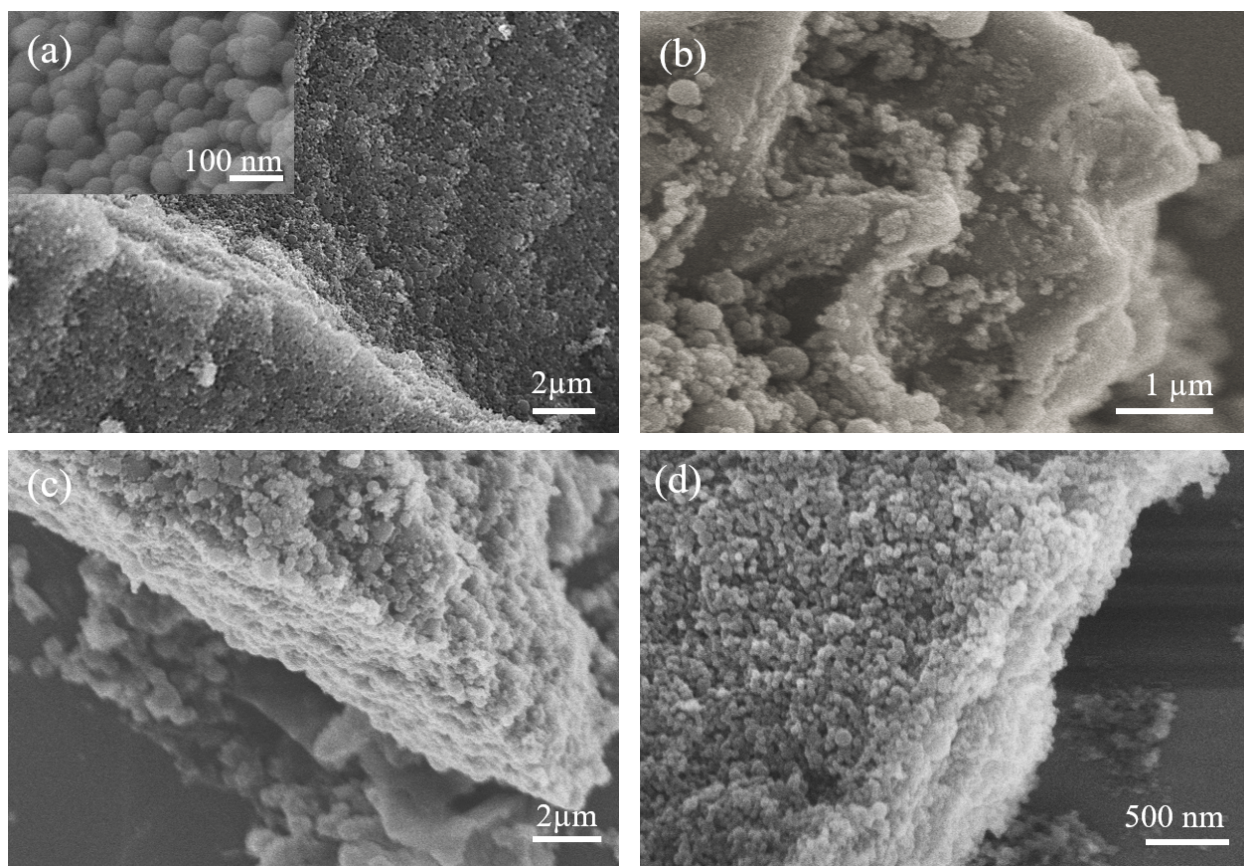

Figure S2 SEM image: (a–b) calcinated NMC@MXene-20, inset of figure (a) is a higher magnification SEM image; and (c–d) calcinated NMC@MXene-30

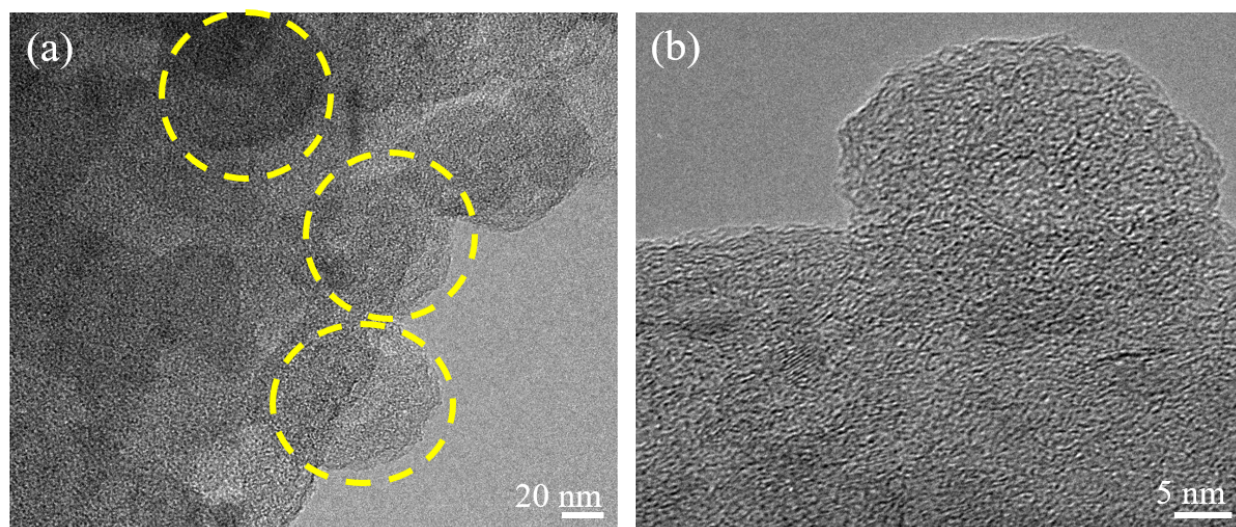

Figure S3: (a)TEM, and (b) HRTEM image of as-prepared NMC@MXene-10.



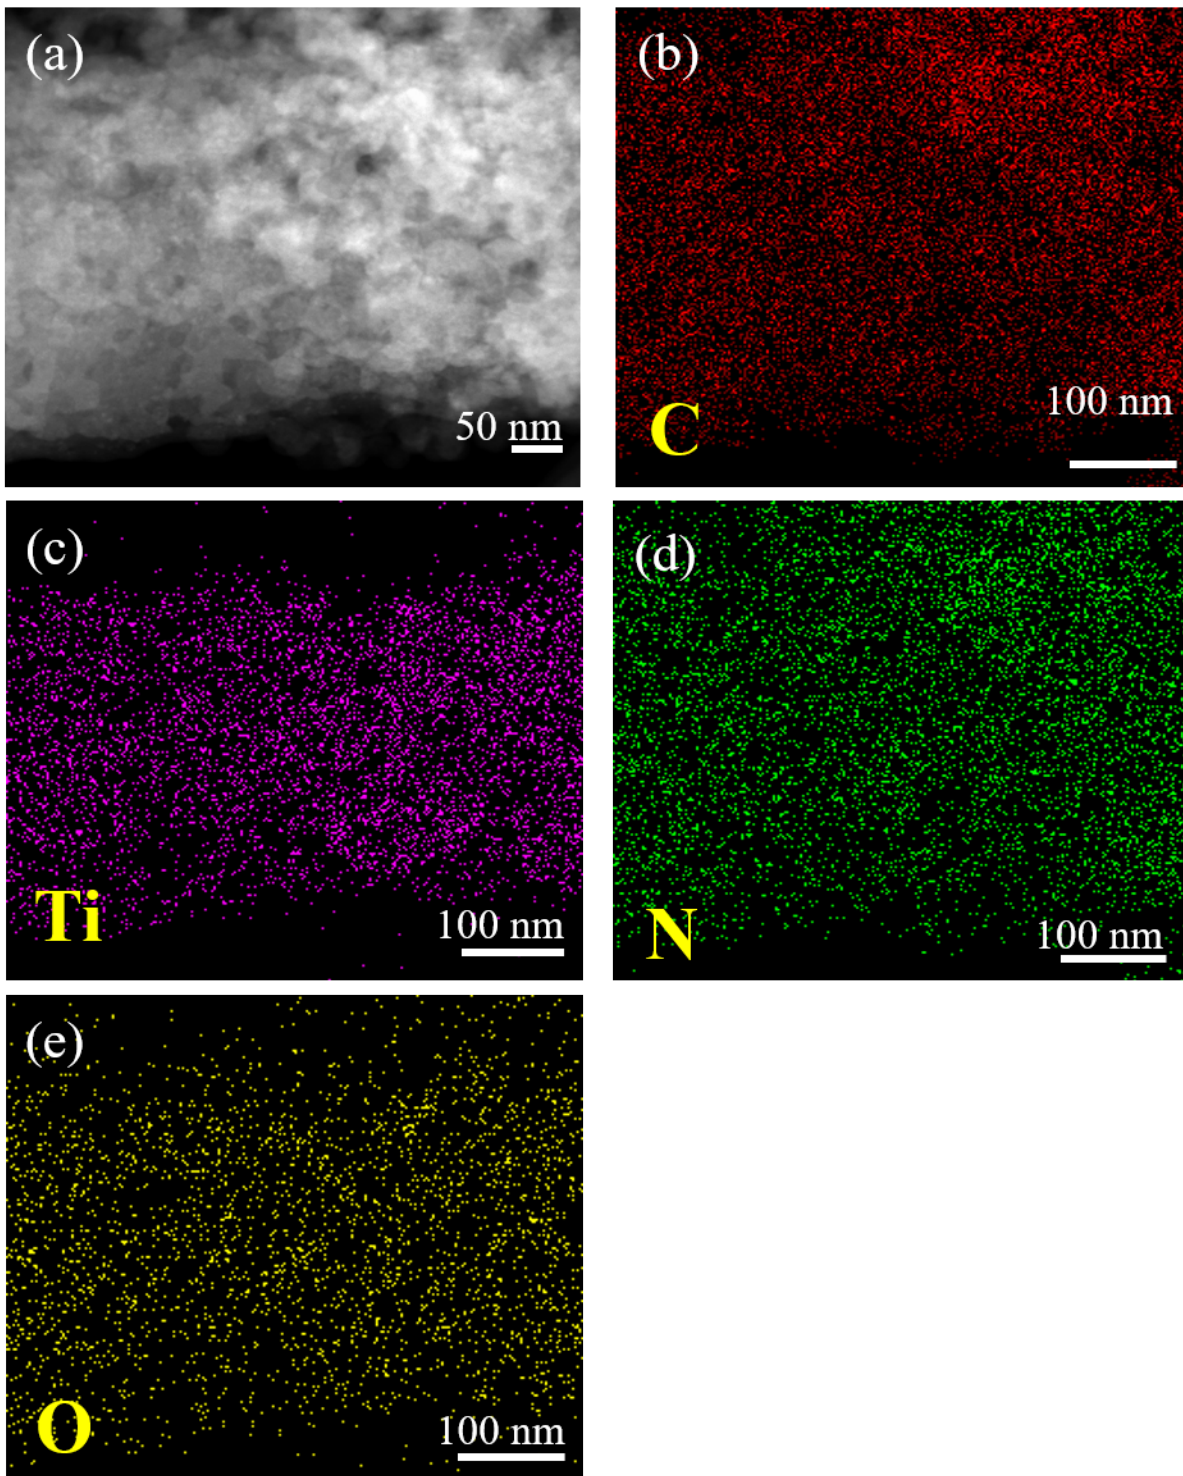

Figure S4: HAADF-STEM image of NMC@MXene-30 and its elemental mapping.

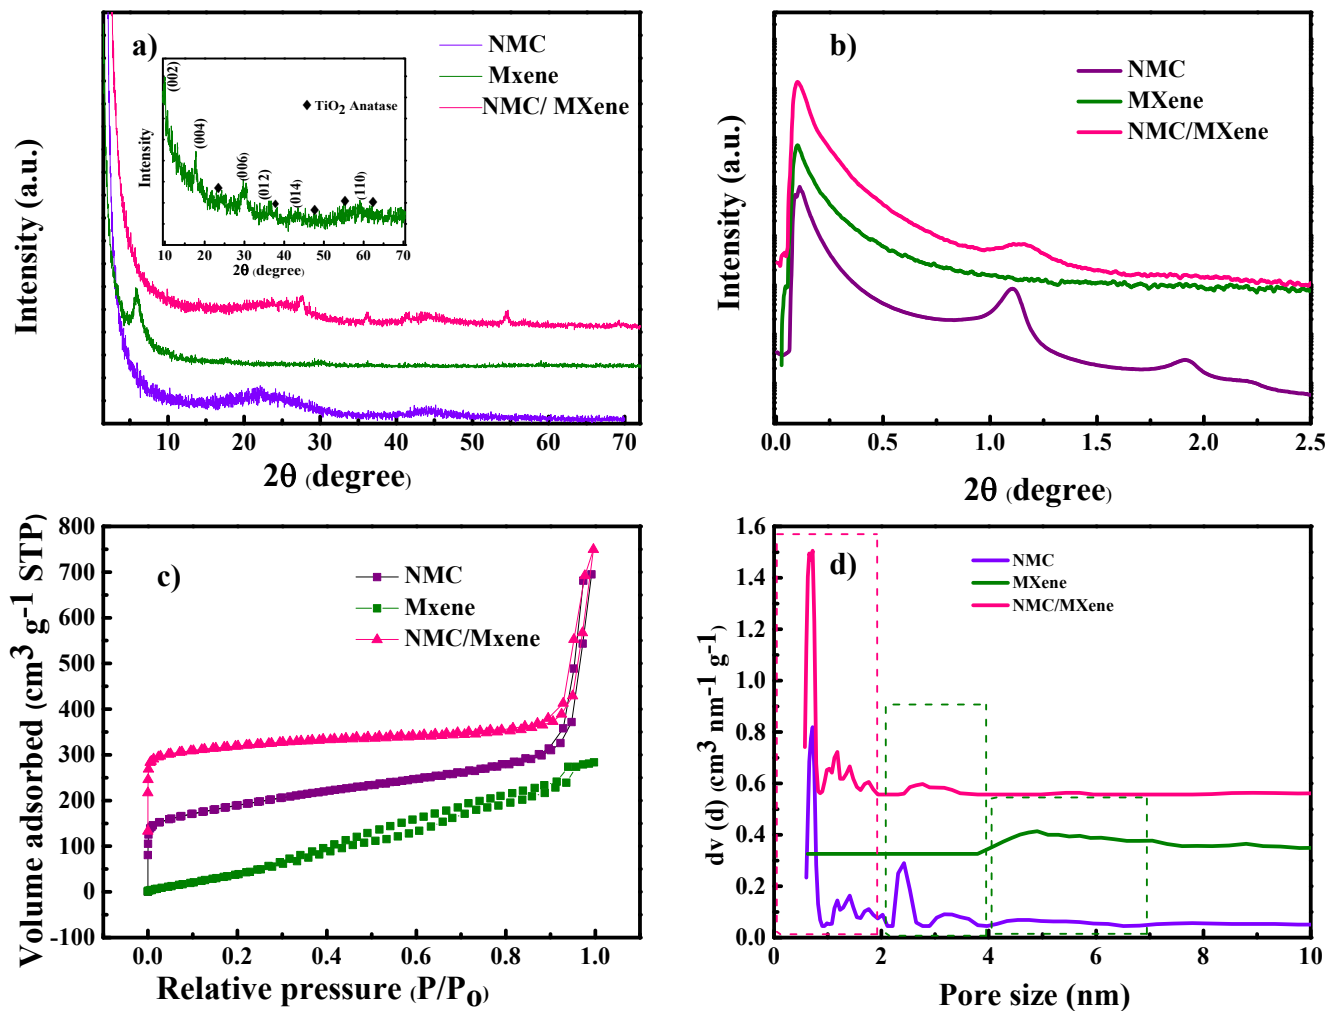

Figure S5 (a) XRD patterns; (b) SAXS patterns; (c) N<sub>2</sub> adsorption–desorption isotherms; and (d) Pore size distribution of NMC, MXene, and NMC/MXene.

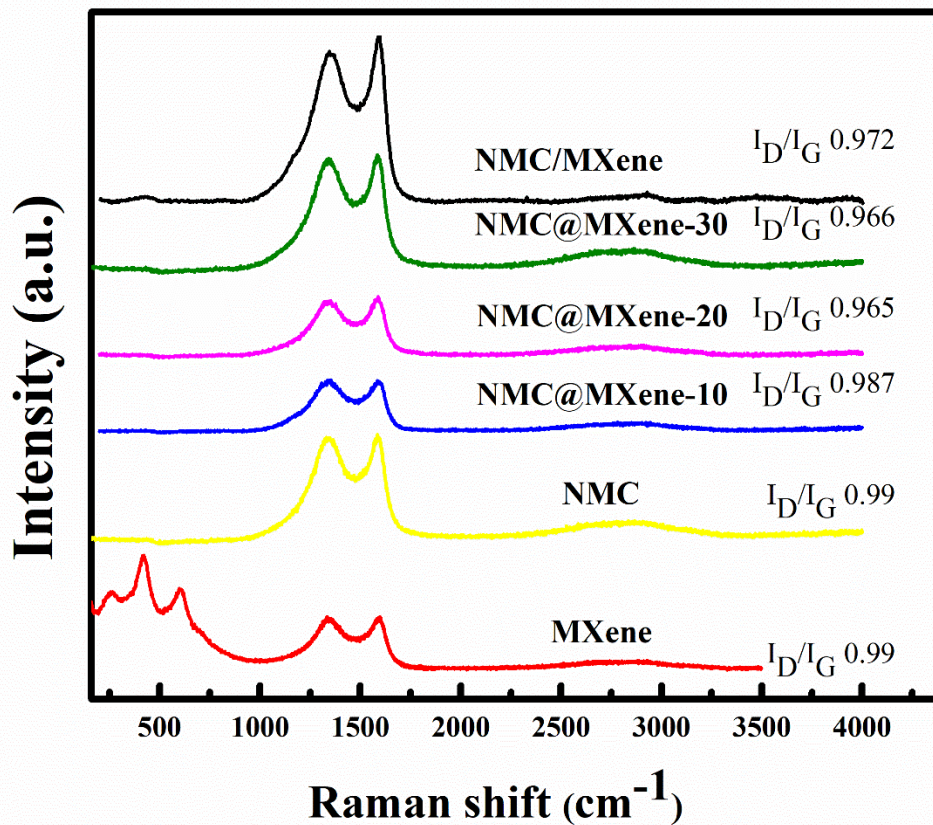

Figure S6: Raman spectra of MXene, NMC, NMC/MXene, and NMC@MXene -x (x=10, 20, and 30).

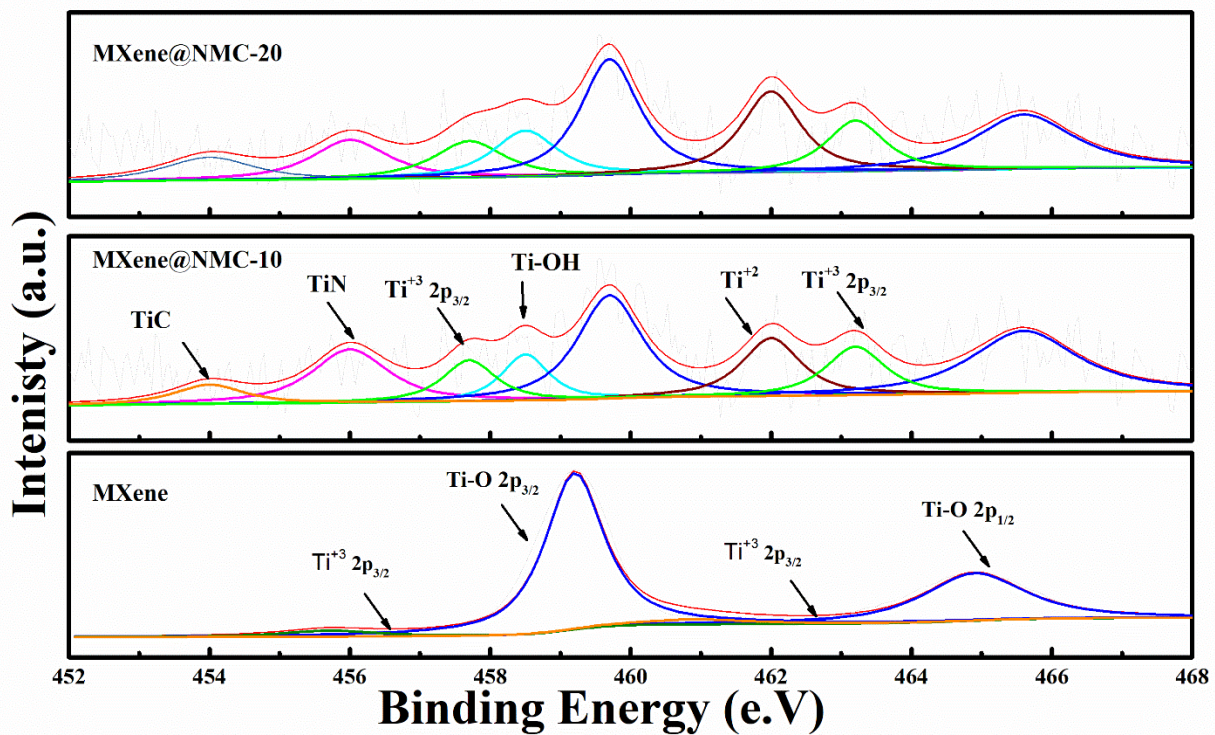

Figure S7: High-resolution XPS spectra of Ti 2p of (MXene, and NMC@MXene- $x$ ) samples after calcination, ( $x=10$ , and 20).

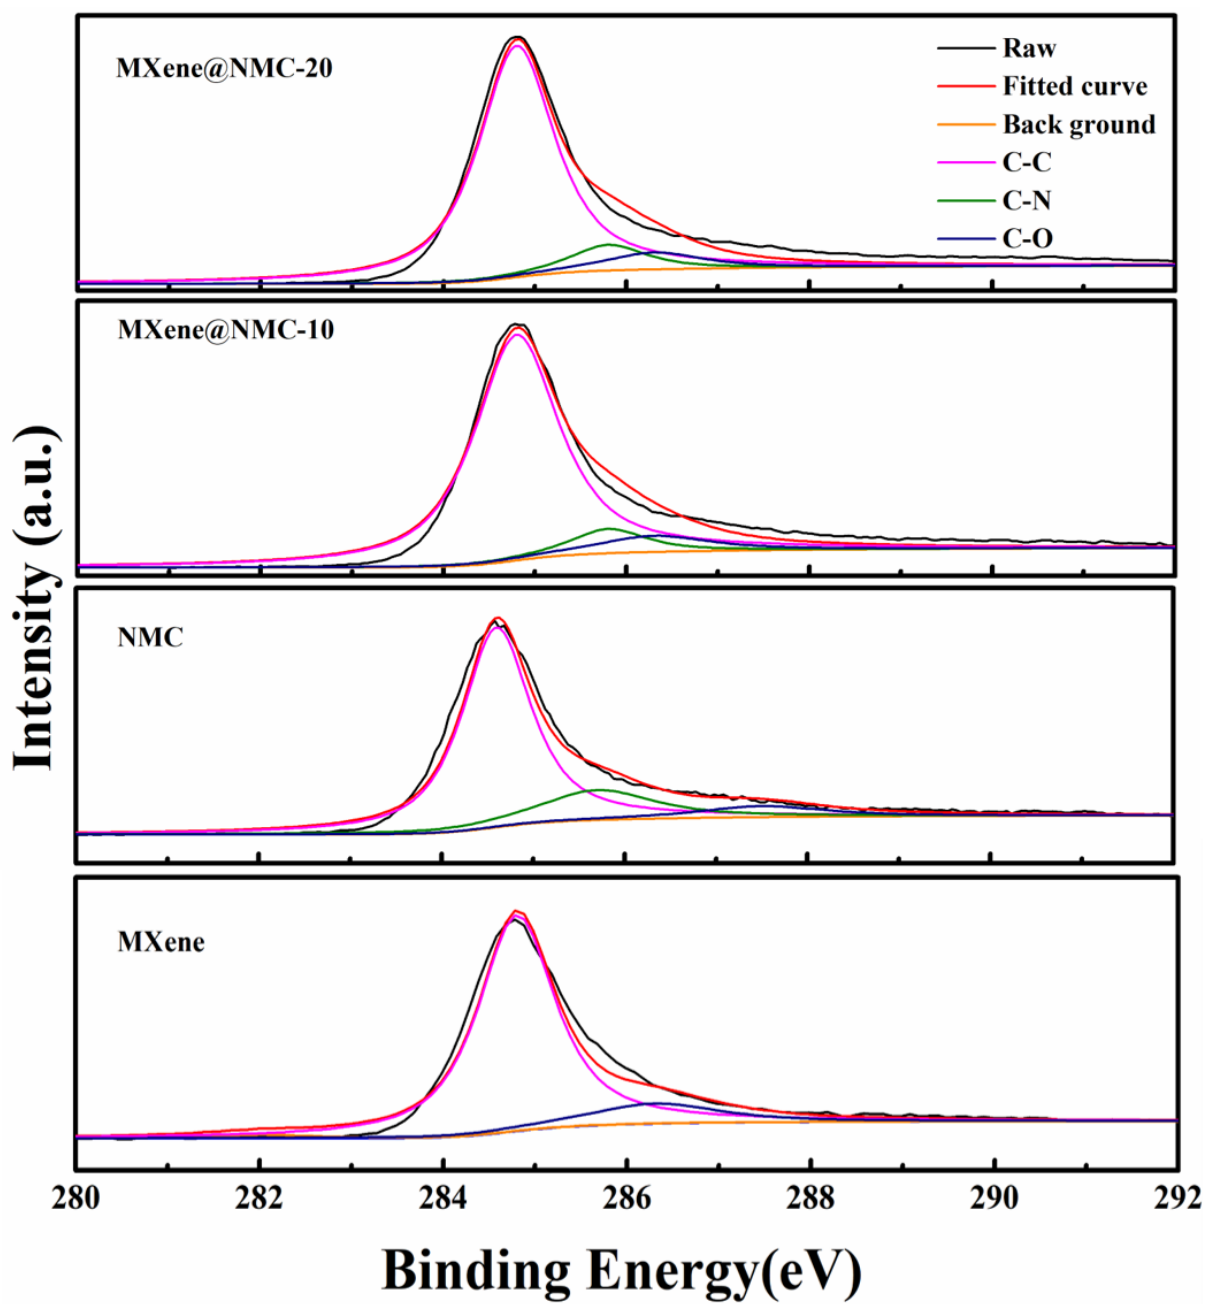

Figure S8: High-resolution XPS spectra of C 1s of (MXene, NMC, and NMC@MXene- $x$ ) samples after calcination, ( $x=10$ , and 20).



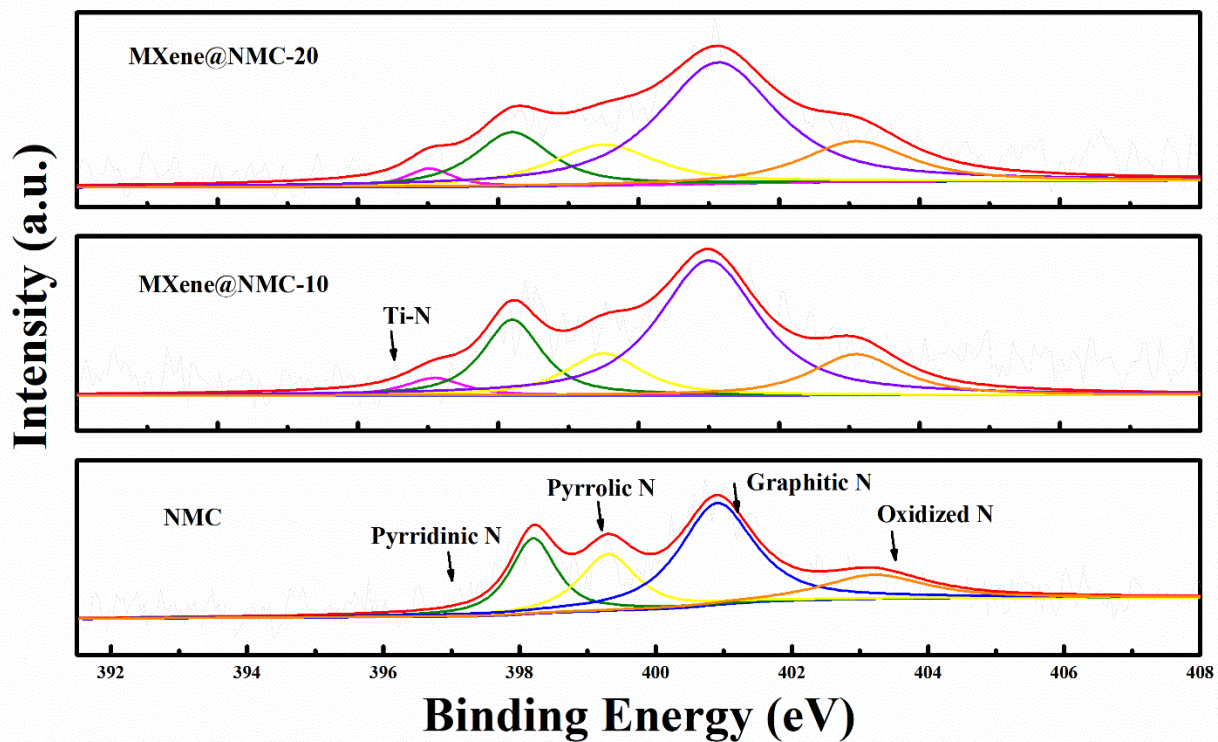

Figure S9: High-resolution XPS spectra of N1s of ( NMC and NMC@MXene- $x$  ) samples after calcination, ( $x=10$ , and  $20$ ,).

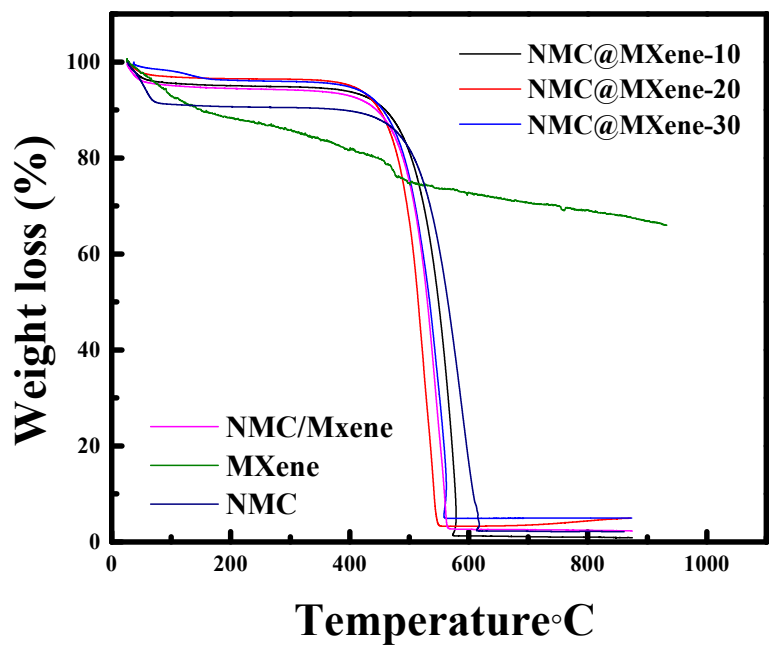

Figure S10: TGA curves of (NMC, MXene, NMC/MXene, and NMC@MXene- $x$ ) samples after calcination measured under air atmosphere, ( $x=10, 20,$  and  $30$ ).

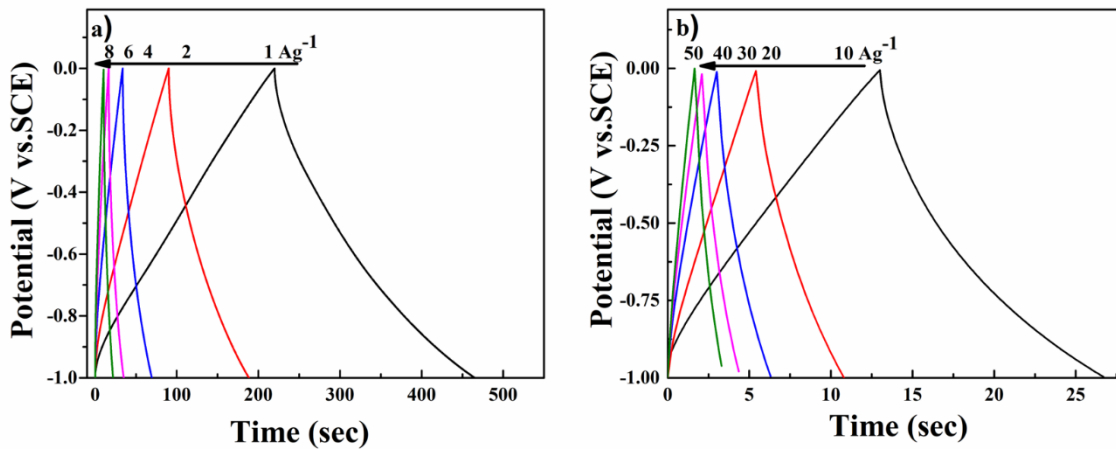

Figure S11: Charge discharge curve of NMC@MXene-10.

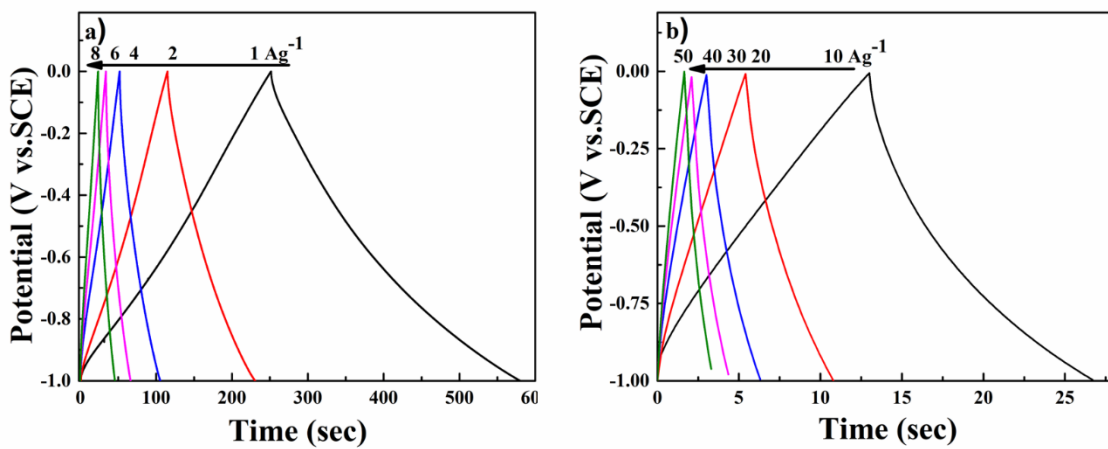

Figure S12: Charge discharge curve NMC@MXene-20.

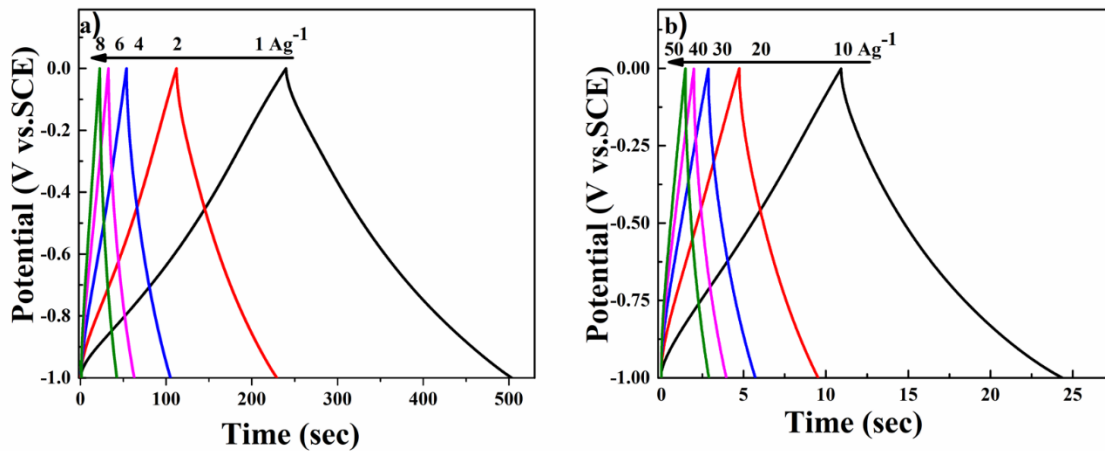

Figure S13: Charge discharge curve of NMC/MXene.

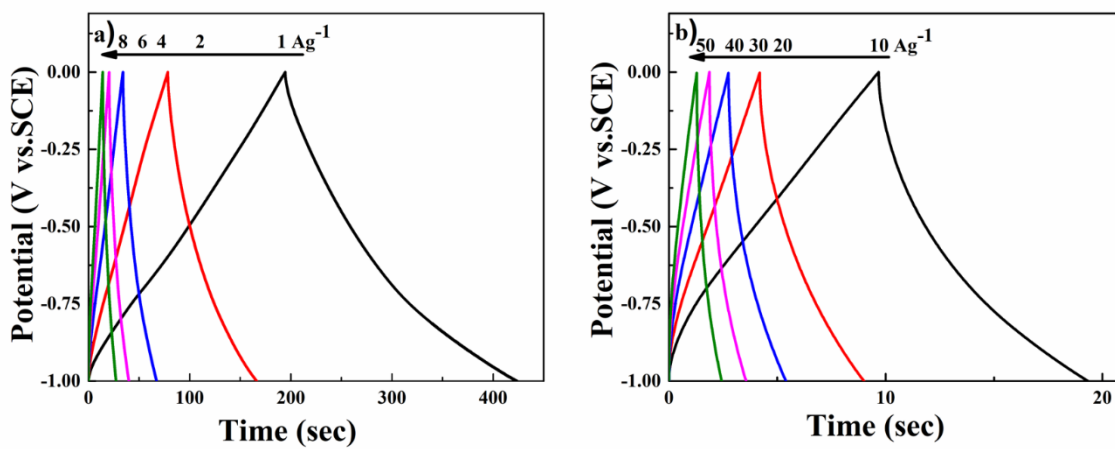

Figure S14: Charge discharge curve of MXene.



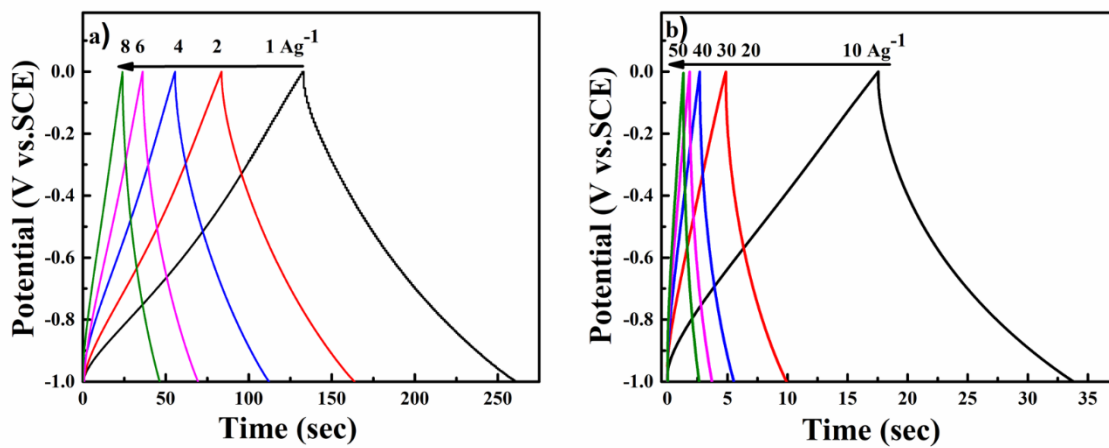

Figure S15: Charge discharge curve of NMC.

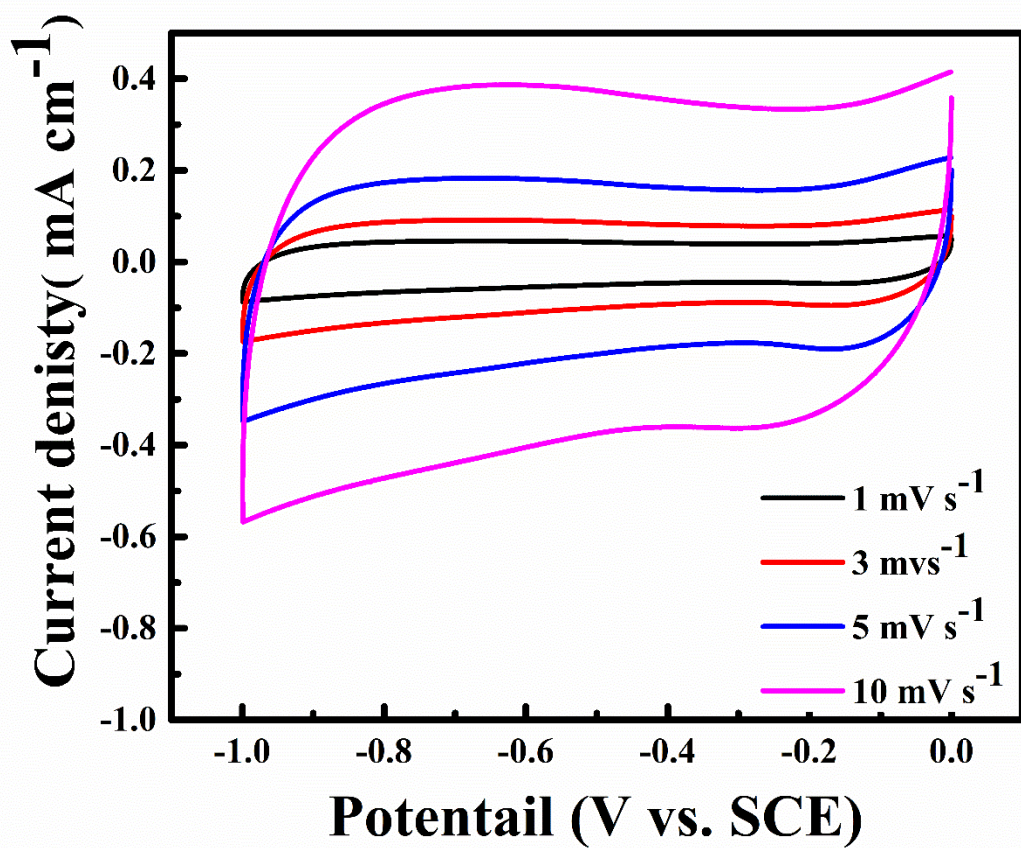

Figure S16 CV curves of NMC@MXene-30 in a two-electrode system at 1 mV s<sup>-1</sup>, 3 mV s<sup>-1</sup>, 5 mV s<sup>-1</sup>, 10 mV s<sup>-1</sup>

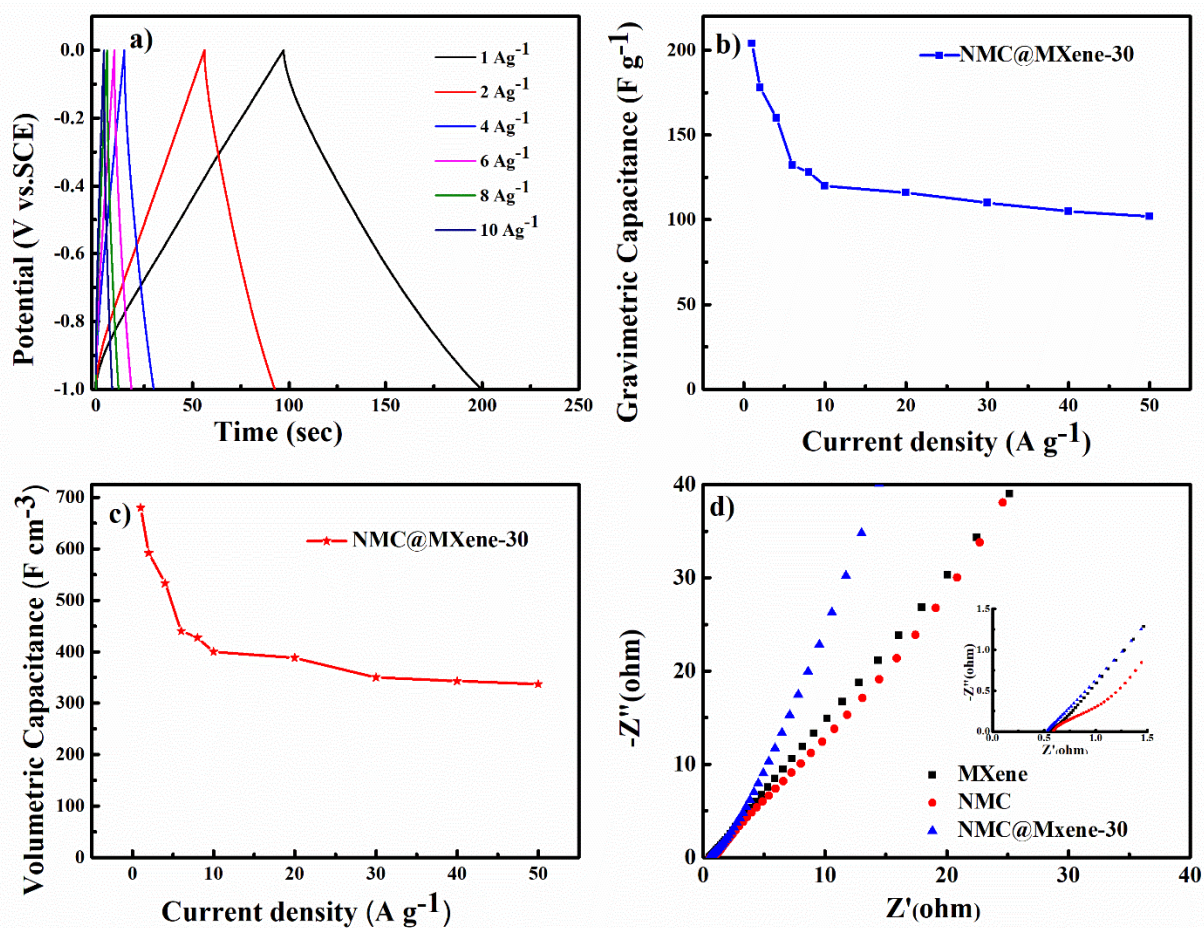

Figure S17: Electrochemical performances of NMC@MXene-30 in a two-electrode system: (a) Charge discharge curves at various current densities, (b) gravimetric capacitance, (c) volumetric capacitance at different current densities and (d) Nyquist plots of the MXene, NMC and NMC@MXene-30 tested in the symmetric cell.
